# Supplementary material for: Multi-omics Approaches to Uncover Liquid-Based Cancer-Predicting Biomarkers in Lynch Syndrome
Source: Research Square preprint supplement (doi:10.21203/rs.3.rs-5682364/v1), 2025-01-03
Supplement: Supplementary file 1 [file 32473030f0c5473d7b8ce066.xlsx]

## Sheet: Info
MiRWalk GSEA results
http://mirwalk.umm.uni-heidelberg.de/
Content:
1 = List of microRNAs involveld in the analysis
2 = GSEA results. This table lists only the BH <0.05 enriched pathways.
3 = List of target mRNAs

## Sheet: 1. Analyzed_microRNAs
The list of pink module miRs
hsa-miR-101-3p
hsa-miR-182-5p
hsa-miR-183-5p
hsa-miR-25-3p
hsa-miR-4732-3p
hsa-miR-532-5p
hsa-miR-660-5p
hsa-miR-7-5p
hsa-miR-93-5p

## Sheet: 2. miRWalk_GSEA_results
Name	Hits	Pop Hits	List Total	Pop Total	Pvalue	adjusted Pvalue(BH)
hsa04144_Endocytosis	10	250	65	8586	0.0001	0.0031
hsa05215_Prostate_cancer	6	97	65	8586	0.0002	0.0031
hsa05161_Hepatitis_B	7	162	65	8586	0.0004	0.0041
hsa01522_Endocrine_resistance	5	98	65	8586	0.0014	0.0058
hsa04066_HIF-1_signaling_pathway	5	109	65	8586	0.0021	0.0058
hsa04510_Focal_adhesion	7	203	65	8586	0.0015	0.0058
hsa04668_TNF_signaling_pathway	5	114	65	8586	0.0025	0.0058
hsa04713_Circadian_entrainment	5	97	65	8586	0.0013	0.0058
hsa04725_Cholinergic_synapse	5	113	65	8586	0.0024	0.0058
hsa04934_Cushing_syndrome	6	155	65	8586	0.0018	0.0058
hsa05163_Human_cytomegalovirus_infection	7	225	65	8586	0.0026	0.0058
hsa05166_Human_T-cell_leukemia_virus_1_infection	7	222	65	8586	0.0025	0.0058
hsa05200_Pathways_in_cancer	12	531	65	8586	0.0017	0.0058
hsa05222_Small_cell_lung_cancer	5	92	65	8586	0.001	0.0058
hsa04926_Relaxin_signaling_pathway	5	129	65	8586	0.0042	0.0087
hsa04915_Estrogen_signaling_pathway	5	137	65	8586	0.0053	0.0103
hsa04072_Phospholipase_D_signaling_pathway	5	148	65	8586	0.0073	0.0127
hsa05207_Chemical_carcinogenesis	6	212	65	8586	0.0078	0.0127
hsa05226_Gastric_cancer	5	149	65	8586	0.0074	0.0127
hsa04151_PI3K-Akt_signaling_pathway	8	359	65	8586	0.0093	0.0139
hsa05160_Hepatitis_C	5	158	65	8586	0.0094	0.0139
hsa05206_MicroRNAs_in_cancer	7	310	65	8586	0.0133	0.0187
hsa04360_Axon_guidance	5	182	65	8586	0.0161	0.0208
hsa05152_Tuberculosis	5	180	65	8586	0.0154	0.0208
hsa05165_Human_papillomavirus_infection	7	331	65	8586	0.0181	0.0224
hsa05167_Kaposi_sarcoma-associated_herpesvirus_infection	5	194	65	8586	0.0203	0.0242
hsa05169_Epstein-Barr_virus_infection	5	202	65	8586	0.0236	0.027
hsa05203_Viral_carcinogenesis	5	204	65	8586	0.0244	0.027
hsa04810_Regulation_of_actin_cytoskeleton	5	229	65	8586	0.0368	0.0393
hsa05131_Shigellosis	5	247	65	8586	0.0477	0.0493

## Sheet: 3. List_of_target_mRNAs
Entrezid	Genesymbol	Description
4286	MITF	Homo sapiens melanocyte inducing transcription factor (MITF),transcript variant 4, mRNA.
5311	PKD2	Homo sapiens polycystin 2, transient receptor potential cationchannel (PKD2), transcript variant 1, mRNA.
6310	ATXN1	Homo sapiens ataxin 1 (ATXN1), transcript variant 1, mRNA.
3949	LDLR	Homo sapiens low density lipoprotein receptor (LDLR), transcriptvariant 1, mRNA.
596	BCL2	Homo sapiens BCL2 apoptosis regulator (BCL2), transcript variantalpha, mRNA.
5638	PRRG1	Homo sapiens proline rich and Gla domain 1 (PRRG1), transcriptvariant 1, mRNA.
80223	RAB11FIP1	Homo sapiens RAB11 family interacting protein 1 (RAB11FIP1),transcript variant 3, mRNA.
55727	BTBD7	Homo sapiens BTB domain containing 7 (BTBD7), transcript variant 1,mRNA.
6259	RYK	Homo sapiens receptor like tyrosine kinase (RYK), transcriptvariant 1, mRNA.
96459	FNIP1	Homo sapiens folliculin interacting protein 1 (FNIP1), transcriptvariant 2, mRNA.
122830	NAA30	Homo sapiens N-alpha-acetyltransferase 30, NatC catalytic subunit(NAA30), mRNA.
285704	RGMB	Homo sapiens repulsive guidance molecule BMP co-receptor b (RGMB),transcript variant 2, mRNA.
55294	FBXW7	Homo sapiens F-box and WD repeat domain containing 7 (FBXW7),transcript variant 3, mRNA.
122525	C14orf28	Homo sapiens chromosome 14 open reading frame 28 (C14orf28), mRNA.
9467	SH3BP5	Homo sapiens SH3 domain binding protein 5 (SH3BP5), transcriptvariant 2, mRNA.
390980	ZNF805	Homo sapiens zinc finger protein 805 (ZNF805), transcript variant1, mRNA.
375	ARF1	Homo sapiens ADP ribosylation factor 1 (ARF1), transcript variant3, mRNA.
554251	FBXO48	Homo sapiens F-box protein 48 (FBXO48), transcript variant 1, mRNA.
81565	NDEL1	Homo sapiens nudE neurodevelopment protein 1 like 1 (NDEL1),transcript variant 1, mRNA.
387263	C6orf120	Homo sapiens chromosome 6 open reading frame 120 (C6orf120),transcript variant 1, mRNA.
23543	RBFOX2	Homo sapiens RNA binding fox-1 homolog 2 (RBFOX2), transcriptvariant 1, mRNA.
9559	VPS26A	Homo sapiens VPS26, retromer complex component A (VPS26A),transcript variant 2, mRNA.
79183	TTPAL	Homo sapiens alpha tocopherol transfer protein like (TTPAL),transcript variant 2, mRNA.
53344	CHIC1	Homo sapiens cysteine rich hydrophobic domain 1 (CHIC1), transcriptvariant 1, mRNA.
91452	ACBD5	Homo sapiens acyl-CoA binding domain containing 5 (ACBD5),transcript variant 2, mRNA.
10818	FRS2	Homo sapiens fibroblast growth factor receptor substrate 2 (FRS2),transcript variant 2, mRNA.
1982	EIF4G2	Homo sapiens eukaryotic translation initiation factor 4 gamma 2(EIF4G2), transcript variant 2, mRNA.
79796	ALG9	Homo sapiens ALG9 alpha-1,2-mannosyltransferase (ALG9), transcriptvariant 2, mRNA.
10052	GJC1	Homo sapiens gap junction protein gamma 1 (GJC1), transcriptvariant 2, mRNA.
57189	DENND11	Homo sapiens DENN domain containing 11 (DENND11), mRNA.
6925	TCF4	Homo sapiens transcription factor 4 (TCF4), transcript variant 1,mRNA.
91768	CABLES1	Homo sapiens Cdk5 and Abl enzyme substrate 1 (CABLES1), transcriptvariant 2, mRNA.
4204	MECP2	Homo sapiens methyl-CpG binding protein 2 (MECP2), transcriptvariant 2, mRNA.
8503	PIK3R3	Homo sapiens phosphoinositide-3-kinase regulatory subunit 3(PIK3R3), transcript variant 2, mRNA.
115	ADCY9	Homo sapiens adenylate cyclase 9 (ADCY9), mRNA.
5537	PPP6C	Homo sapiens protein phosphatase 6 catalytic subunit (PPP6C),transcript variant 1, mRNA.
29127	RACGAP1	Homo sapiens Rac GTPase activating protein 1 (RACGAP1), transcriptvariant 2, mRNA.
54675	CRLS1	Homo sapiens cardiolipin synthase 1 (CRLS1), transcript variant 2,mRNA.
7037	TFRC	Homo sapiens transferrin receptor (TFRC), transcript variant 2,mRNA.
9583	ENTPD4	Homo sapiens ectonucleoside triphosphate diphosphohydrolase 4(ENTPD4), transcript variant 2, mRNA.
6815	STYX	Homo sapiens serine/threonine/tyrosine interacting protein (STYX),transcript variant 2, mRNA.
9922	IQSEC1	Homo sapiens IQ motif and Sec7 domain ArfGEF 1 (IQSEC1), transcriptvariant 1, mRNA.
23576	DDAH1	Homo sapiens dimethylarginine dimethylaminohydrolase 1 (DDAH1),transcript variant 2, mRNA.
134553	C5orf24	Homo sapiens chromosome 5 open reading frame 24 (C5orf24),transcript variant 1, mRNA.
55920	RCC2	Homo sapiens regulator of chromosome condensation 2 (RCC2),transcript variant 2, mRNA.
8439	NSMAF	Homo sapiens neutral sphingomyelinase activation associated factor(NSMAF), transcript variant 2, mRNA.
23608	MKRN1	Homo sapiens makorin ring finger protein 1 (MKRN1), transcriptvariant 2, mRNA.
80821	DDHD1	Homo sapiens DDHD domain containing 1 (DDHD1), transcript variant2, mRNA.
651746	ANKRD33B	Homo sapiens ankyrin repeat domain 33B (ANKRD33B), mRNA.
3416	IDE	Homo sapiens insulin degrading enzyme (IDE), transcript variant 2,mRNA.
323	APBB2	Homo sapiens amyloid beta precursor protein binding family B member2 (APBB2), transcript variant 2, mRNA.
331	XIAP	Homo sapiens X-linked inhibitor of apoptosis (XIAP), transcriptvariant 1, mRNA.
11044	TENT4A	Homo sapiens terminal nucleotidyltransferase 4A (TENT4A),transcript variant 2, mRNA.
2802	GOLGA3	Homo sapiens golgin A3 (GOLGA3), transcript variant 2, mRNA.
142891	SAMD8	Homo sapiens sterile alpha motif domain containing 8 (SAMD8),transcript variant 1, mRNA.
192683	SCAMP5	Homo sapiens secretory carrier membrane protein 5 (SCAMP5),transcript variant 1, mRNA.
6047	RNF4	Homo sapiens ring finger protein 4 (RNF4), transcript variant 1,mRNA.
4781	NFIB	Homo sapiens nuclear factor I B (NFIB), transcript variant 1, mRNA.
1654	DDX3X	Homo sapiens DEAD-box helicase 3 X-linked (DDX3X), transcriptvariant 2, mRNA.
5978	REST	Homo sapiens RE1 silencing transcription factor (REST), transcriptvariant 2, mRNA.
23396	PIP5K1C	Homo sapiens phosphatidylinositol-4-phosphate 5-kinase type 1 gamma(PIP5K1C), transcript variant 1, mRNA.
55074	OXR1	Homo sapiens oxidation resistance 1 (OXR1), transcript variant 3,mRNA.
51277	DNAJC27	Homo sapiens DnaJ heat shock protein family (Hsp40) member C27(DNAJC27), transcript variant 2, mRNA.
22887	FOXJ3	Homo sapiens forkhead box J3 (FOXJ3), transcript variant 2, mRNA.
55614	KIF16B	Homo sapiens kinesin family member 16B (KIF16B), transcript variant3, mRNA.
79660	PPP1R3B	Homo sapiens protein phosphatase 1 regulatory subunit 3B (PPP1R3B),transcript variant 1, mRNA.
659	BMPR2	Homo sapiens bone morphogenetic protein receptor type 2 (BMPR2),mRNA.
51742	ARID4B	Homo sapiens AT-rich interaction domain 4B (ARID4B), transcriptvariant 3, mRNA.
5869	RAB5B	Homo sapiens RAB5B, member RAS oncogene family (RAB5B), transcriptvariant 2, mRNA.
390	RND3	Homo sapiens Rho family GTPase 3 (RND3), transcript variant 1,mRNA.
10299	MARCHF6	Homo sapiens membrane associated ring-CH-type finger 6 (MARCHF6),transcript variant 2, mRNA.
94134	ARHGAP12	Homo sapiens Rho GTPase activating protein 12 (ARHGAP12),transcript variant 2, mRNA.
57826	RAP2C	Homo sapiens RAP2C, member of RAS oncogene family (RAP2C),transcript variant 1, mRNA.
5998	RGS3	Homo sapiens regulator of G protein signaling 3 (RGS3), transcriptvariant 7, mRNA.
55432	YOD1	Homo sapiens YOD1 deubiquitinase (YOD1), transcript variant 2,mRNA.
79791	FBXO31	Homo sapiens F-box protein 31 (FBXO31), transcript variant 2, mRNA.
51430	SUCO	Homo sapiens SUN domain containing ossification factor (SUCO),transcript variant 3, mRNA.
54462	CCSER2	Homo sapiens coiled-coil serine rich protein 2 (CCSER2), transcriptvariant 1, mRNA.
5316	PKNOX1	Homo sapiens PBX/knotted 1 homeobox 1 (PKNOX1), transcript variant2, mRNA.
9764	KIAA0513	Homo sapiens KIAA0513 (KIAA0513), transcript variant 1, mRNA.
115294	PCMTD1	Homo sapiens protein-L-isoaspartate (D-aspartate)O-methyltransferase domain containing 1 (PCMTD1), transcript
64418	TMEM168	Homo sapiens transmembrane protein 168 (TMEM168), transcriptvariant 1, mRNA.
2045	EPHA7	Homo sapiens EPH receptor A7 (EPHA7), transcript variant 2, mRNA.
59084	ENPP5	Homo sapiens ectonucleotide pyrophosphatase/phosphodiesterasefamily member 5 (ENPP5), transcript variant 1, mRNA.
3177	SLC29A2	Homo sapiens solute carrier family 29 member 2 (SLC29A2),transcript variant 1, mRNA.
56946	EMSY	Homo sapiens EMSY transcriptional repressor, BRCA2 interacting(EMSY), transcript variant 1, mRNA.
89970	RSPRY1	Homo sapiens ring finger and SPRY domain containing 1 (RSPRY1),transcript variant 2, mRNA.
112399	EGLN3	Homo sapiens egl-9 family hypoxia inducible factor 3 (EGLN3),transcript variant 2, mRNA.
80012	PHC3	Homo sapiens polyhomeotic homolog 3 (PHC3), transcript variant 2,mRNA.
7813	EVI5	Homo sapiens ecotropic viral integration site 5 (EVI5), transcriptvariant 1, mRNA.
51761	ATP8A2	Homo sapiens ATPase phospholipid transporting 8A2 (ATP8A2),transcript variant 2, mRNA.
151742	PPM1L	Homo sapiens protein phosphatase, Mg2+/Mn2+ dependent 1L (PPM1L),transcript variant 2, mRNA.
51341	ZBTB7A	Homo sapiens zinc finger and BTB domain containing 7A (ZBTB7A),transcript variant 2, mRNA.
663	BNIP2	Homo sapiens BCL2 interacting protein 2 (BNIP2), transcript variant1, mRNA.
1385	CREB1	Homo sapiens cAMP responsive element binding protein 1 (CREB1),transcript variant 3, mRNA.
3716	JAK1	Homo sapiens Janus kinase 1 (JAK1), transcript variant 2, mRNA.
2145	EZH1	Homo sapiens enhancer of zeste 1 polycomb repressive complex 2subunit (EZH1), transcript variant 2, mRNA.
9252	RPS6KA5	Homo sapiens ribosomal protein S6 kinase A5 (RPS6KA5), transcriptvariant 3, mRNA.
387893	KMT5A	Homo sapiens lysine methyltransferase 5A (KMT5A), transcriptvariant 2, mRNA.
1956	EGFR	Homo sapiens epidermal growth factor receptor (EGFR), transcriptvariant 5, mRNA.
3659	IRF1	Homo sapiens interferon regulatory factor 1 (IRF1), transcriptvariant 2, mRNA.
5283	PIGH	Homo sapiens phosphatidylinositol glycan anchor biosynthesis classH (PIGH), transcript variant 2, mRNA.
7110	TMF1	Homo sapiens TATA element modulatory factor 1 (TMF1), transcriptvariant 2, mRNA.
10622	POLR3G	Homo sapiens RNA polymerase III subunit G (POLR3G), transcriptvariant 3, mRNA.
22848	AAK1	Homo sapiens AP2 associated kinase 1 (AAK1), transcript variant 2,mRNA.
28512	NKIRAS1	Homo sapiens NFKB inhibitor interacting Ras like 1 (NKIRAS1),transcript variant 2, mRNA.
10681	GNB5	Homo sapiens G protein subunit beta 5 (GNB5), transcript variant 3,mRNA.
54482	TRMT13	Homo sapiens tRNA methyltransferase 13 homolog (TRMT13), transcriptvariant 2, mRNA.
3696	ITGB8	Homo sapiens integrin subunit beta 8 (ITGB8), mRNA.
5775	PTPN4	Homo sapiens protein tyrosine phosphatase non-receptor type 4(PTPN4), mRNA.
6095	RORA	Homo sapiens RAR related orphan receptor A (RORA), transcriptvariant 3, mRNA.
8411	EEA1	Homo sapiens early endosome antigen 1 (EEA1), mRNA.
8534	CHST1	Homo sapiens carbohydrate sulfotransferase 1 (CHST1), mRNA.
1870	E2F2	Homo sapiens E2F transcription factor 2 (E2F2), mRNA.
2909	ARHGAP35	Homo sapiens Rho GTPase activating protein 35 (ARHGAP35), mRNA.
1824	DSC2	Homo sapiens desmocollin 2 (DSC2), transcript variant Dsc2b, mRNA.
10184	LHFPL2	Homo sapiens LHFPL tetraspan subfamily member 2 (LHFPL2), mRNA.
5813	PURA	Homo sapiens purine rich element binding protein A (PURA), mRNA.
7832	BTG2	Homo sapiens BTG anti-proliferation factor 2 (BTG2), mRNA.
11057	ABHD2	Homo sapiens abhydrolase domain containing 2, acylglycerol lipase(ABHD2), transcript variant 1, mRNA.
11334	TUSC2	Homo sapiens tumor suppressor 2, mitochondrial calcium regulator(TUSC2), mRNA.
26224	FBXL3	Homo sapiens F-box and leucine rich repeat protein 3 (FBXL3), mRNA.
29116	MYLIP	Homo sapiens myosin regulatory light chain interacting protein(MYLIP), mRNA.
29946	SERTAD3	Homo sapiens SERTA domain containing 3 (SERTAD3), transcriptvariant 1, mRNA.
22884	WDR37	Homo sapiens WD repeat domain 37 (WDR37), mRNA.
10166	SLC25A15	Homo sapiens solute carrier family 25 member 15 (SLC25A15), mRNA
11215	AKAP11	Homo sapiens A-kinase anchoring protein 11 (AKAP11), mRNA.
54855	TENT5C	Homo sapiens terminal nucleotidyltransferase 5C (TENT5C), mRNA.
54665	RSBN1	Homo sapiens round spermatid basic protein 1 (RSBN1), transcriptvariant 1, mRNA.
54557	SGTB	Homo sapiens small glutamine rich tetratricopeptide repeatco-chaperone beta (SGTB), mRNA.
56648	EIF5A2	Homo sapiens eukaryotic translation initiation factor 5A2 (EIF5A2),mRNA.
56675	NRIP3	Homo sapiens nuclear receptor interacting protein 3 (NRIP3), mRNA.
57493	HEG1	Homo sapiens heart development protein with EGF like domains 1(HEG1), mRNA.
57532	NUFIP2	Homo sapiens nuclear FMR1 interacting protein 2 (NUFIP2), mRNA.
57169	ZNFX1	Homo sapiens zinc finger NFX1-type containing 1 (ZNFX1), mRNA.
8864	PER2	Homo sapiens period circadian regulator 2 (PER2), mRNA.
65124	SOWAHC	Homo sapiens sosondowah ankyrin repeat domain family member C(SOWAHC), mRNA.
79018	GID4	Homo sapiens GID complex subunit 4 homolog (GID4), mRNA.
79056	PRRG4	Homo sapiens proline rich and Gla domain 4 (PRRG4), mRNA.
80311	KLHL15	Homo sapiens kelch like family member 15 (KLHL15), mRNA.
81034	SLC25A32	Homo sapiens solute carrier family 25 member 32 (SLC25A32),transcript variant 1, mRNA
84272	YIPF4	Homo sapiens Yip1 domain family member 4 (YIPF4), mRNA.
116496	NIBAN1	Homo sapiens niban apoptosis regulator 1 (NIBAN1), mRNA.
9134	CCNE2	Homo sapiens cyclin E2 (CCNE2), mRNA.
93624	TADA2B	Homo sapiens transcriptional adaptor 2B (TADA2B), mRNA.
205327	C2orf69	Homo sapiens chromosome 2 open reading frame 69 (C2orf69), mRNA
283209	PGM2L1	Homo sapiens phosphoglucomutase 2 like 1 (PGM2L1), mRNA.
118987	PDZD8	Homo sapiens PDZ domain containing 8 (PDZD8), mRNA.
165324	UBXN2A	Homo sapiens UBX domain protein 2A (UBXN2A), mRNA.
127262	TPRG1L	Homo sapiens tumor protein p63 regulated 1 like (TPRG1L), mRNA.
10721	POLQ	Homo sapiens DNA polymerase theta (POLQ), mRNA.
283377	SPRYD4	Homo sapiens SPRY domain containing 4 (SPRYD4), mRNA.
