# Supplementary material for: Multi-omics Approaches to Uncover Liquid-Based Cancer-Predicting Biomarkers in Lynch Syndrome
Source: Research Square preprint supplement (doi:10.21203/rs.3.rs-5682364/v1), 2025-01-03
Supplement: Supplementary file 1 [file f0e14f67a35535c7586e2349.pdf]

## Supplementary Figures

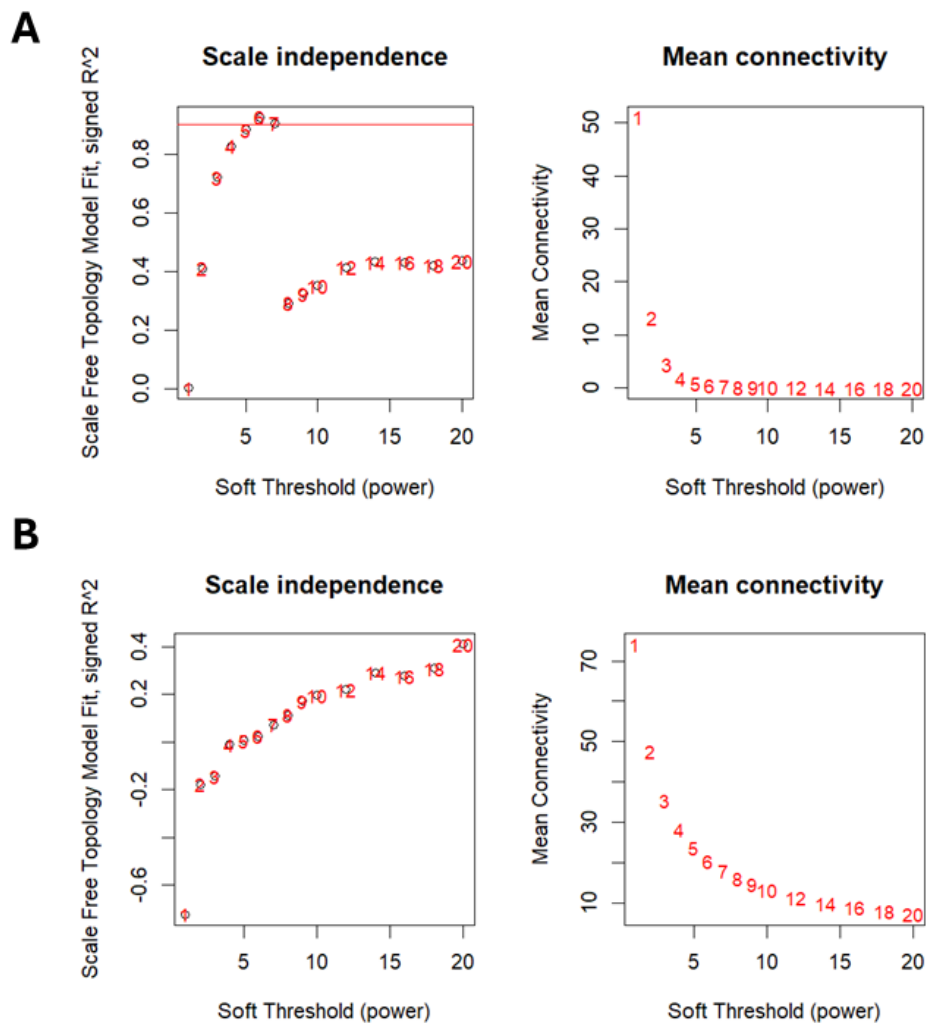

**SFig. 1.** Soft-thresholding power selection for WGCNA. A) Presents soft-thresholding results for the cmiRs. The left panel shows the scale-free topology model fit (signed  $R^2$ ) as a function of the soft-thresholding power, with a threshold (0.9) indicated for scale-free topology. The right panel presents mean connectivity as a function of soft-thresholding power. B) Soft-thresholding results of cMets, with similar plots for scale-free topology fit and mean connectivity. A higher soft-thresholding power achieves the desired scale-free network topology while balancing mean connectivity.

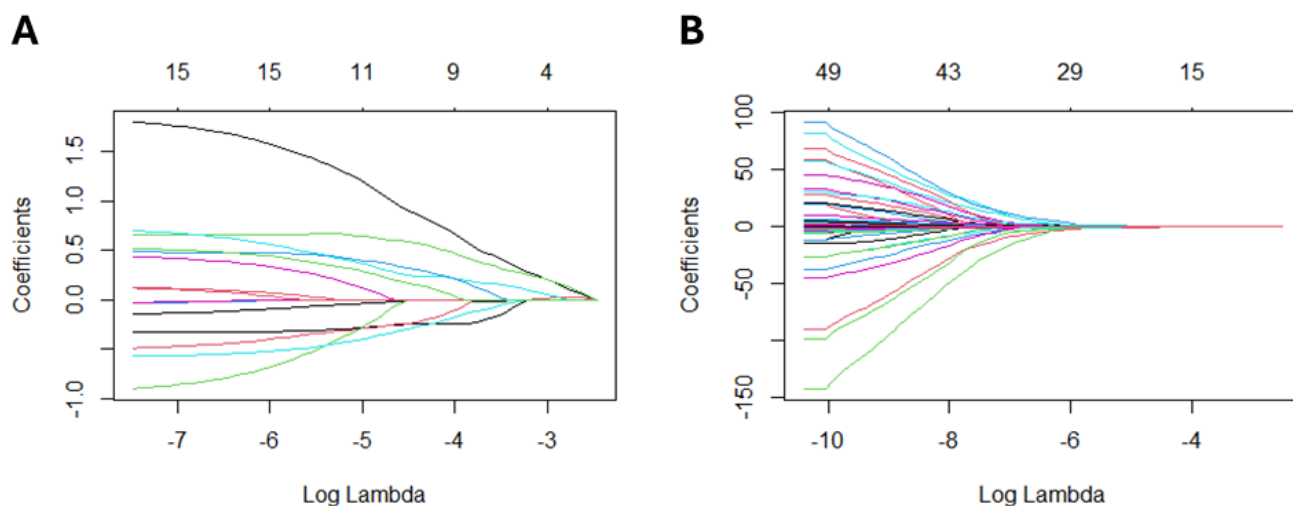

**SFig. 2.** Coefficients from Lasso Cox regression for selected features. (A) Coefficients for cmiRs as the tuning parameter  $\lambda$  varies. (B) Coefficients for cMets as  $\lambda$  varies. The x-axis shows the log-transformed values of  $\lambda$ , with smaller values representing less regularization. The y-axis represents the coefficient values. As  $\lambda$  increases, coefficients move towards zero, leaving only cmiRs and cMets above zero in the predictive model.

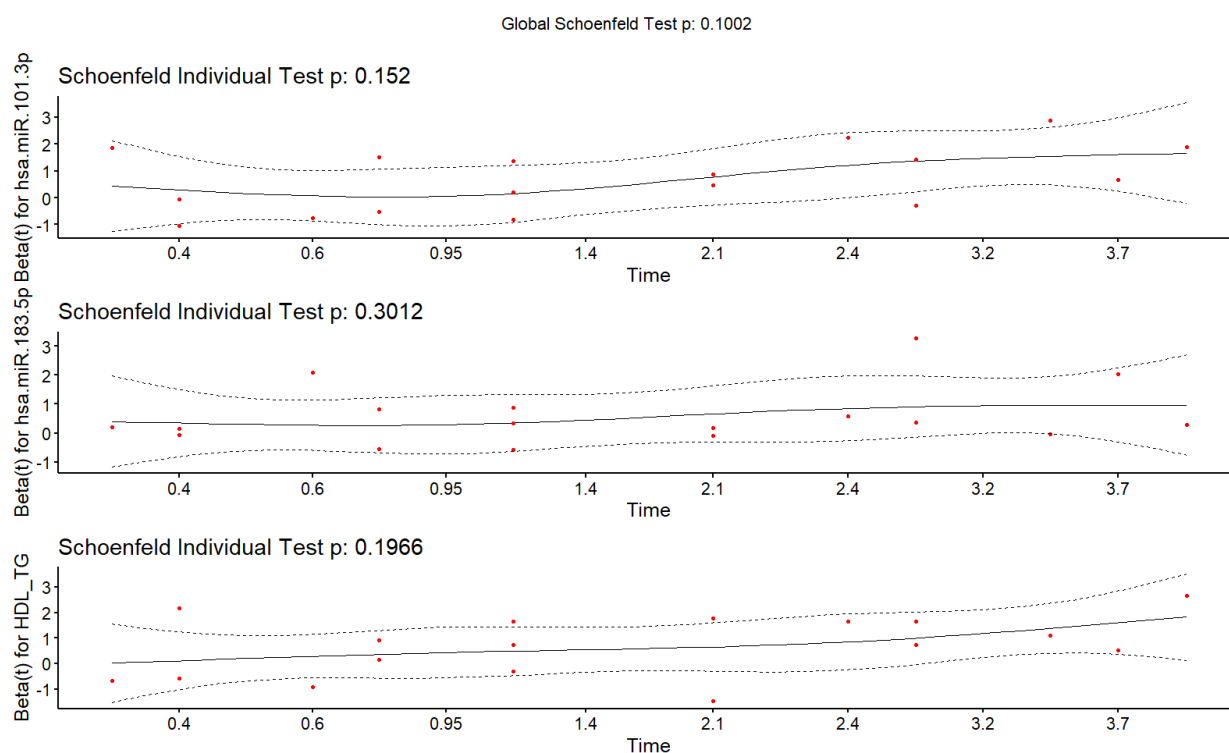

**SFig. 3.** Schoenfeld residuals for testing the proportional hazards assumption in the Cox regression model. Each plot shows the time-dependent residuals for individual predictors. The y-axis represents the beta coefficient for each predictor over time, while the x-axis shows time. Solid lines represent the estimated coefficient trend over time, and dashed lines indicate confidence intervals. The p-values from individual Schoenfeld tests are provided for each predictor, with the global Schoenfeld test result displayed at the top, assessing overall proportionality in the model.

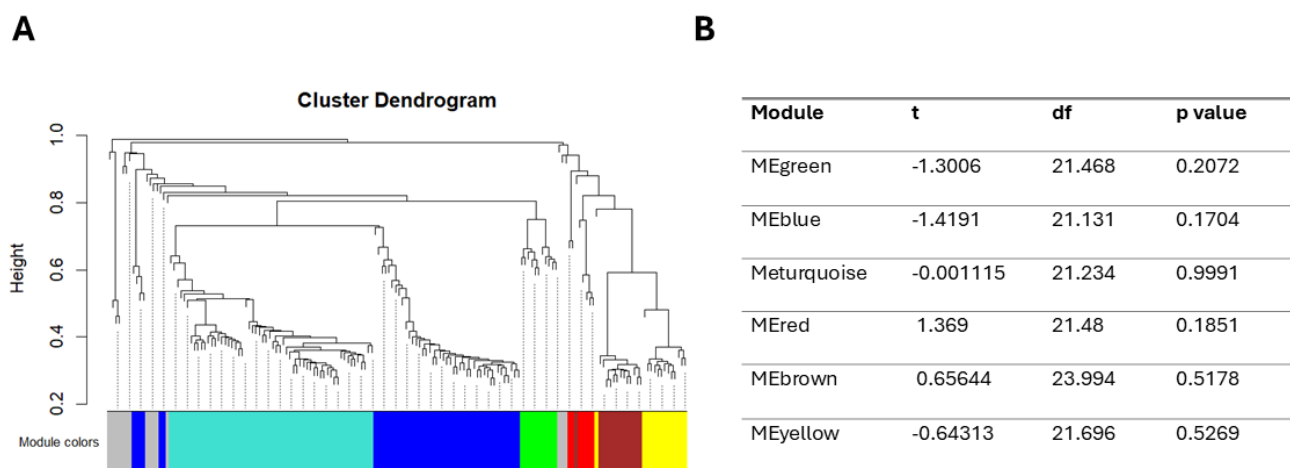

**SFig. 4.** Weighted Correlation Network Analysis (WGCNA) on cMets levels. A) The cluster dendrogram depicting gene modules generated via hierarchical clustering of the expression similarity matrix. B) Using the T-test, the table shows the mean difference between the cMet modules and status groups (Future cancer-Healthy).

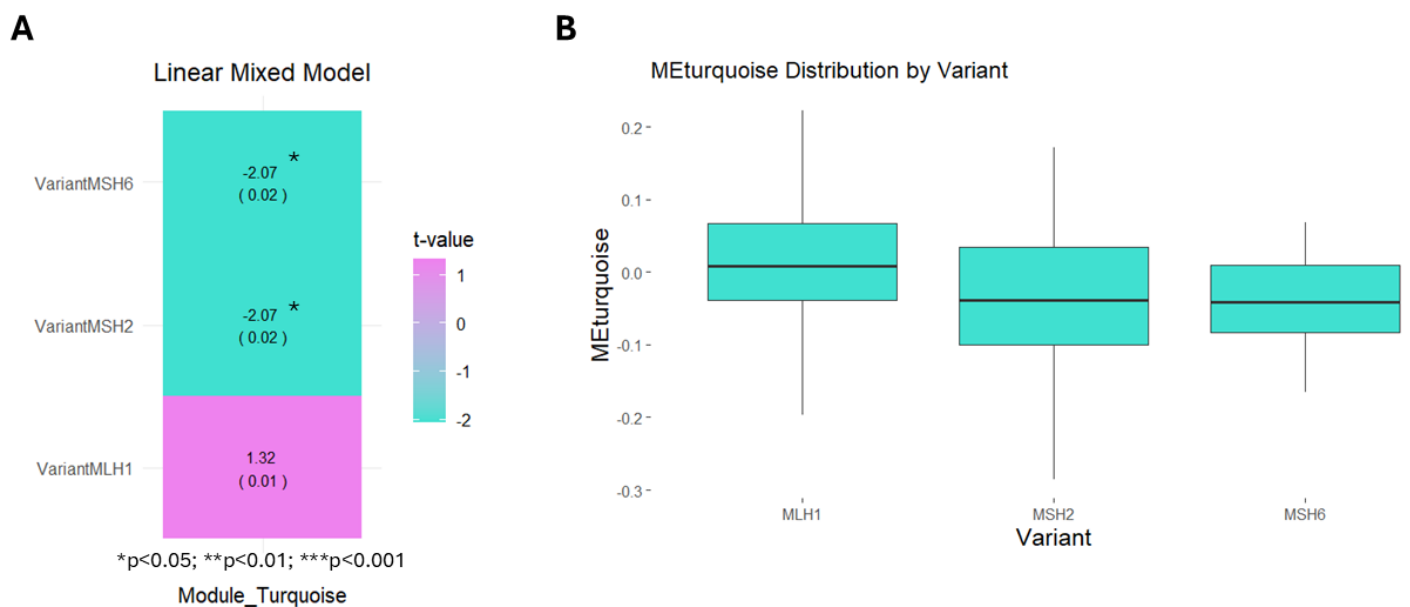

**SFig. 5.** A) Linear mixed model of the average effect of predictor variables (*path\_MMR* variant) on the response variable (MEturquoise) across all levels of the random effects (Age & BMI). Trait-module associations are shown as t-values with (Std. Error), and significance indicators \*p<0.05; \*\*p<0.01; \*\*\*p<0.001. B) Distribution of the MEturquoise among *path\_MMR* variant carriers.

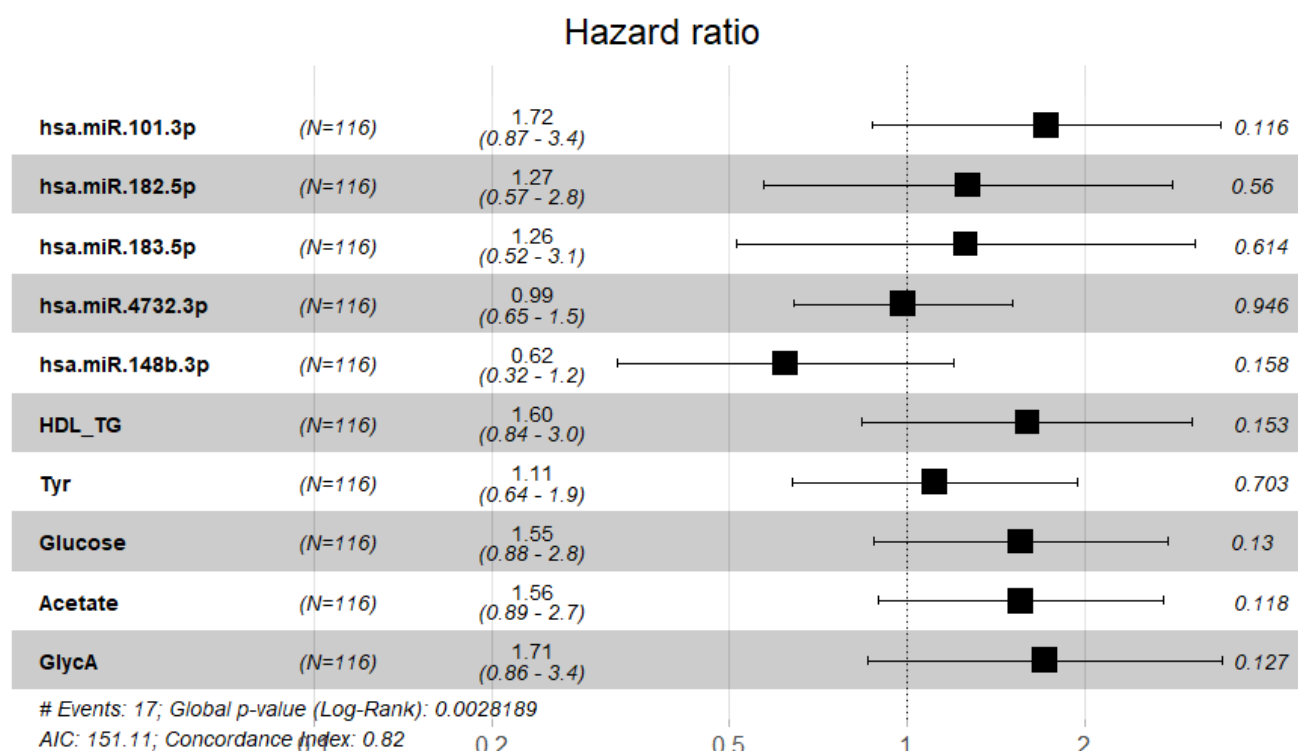

**SFig. 6.** A forest plot of the Cox regression model fit with 10 predictive biomarkers obtained from Lasso Cox feature selection. The plot shows biomarkers coefficients (estimated HRs), confidence intervals, C-index, and significance. The coefficients above 1 are considered to increase the cancer risk.

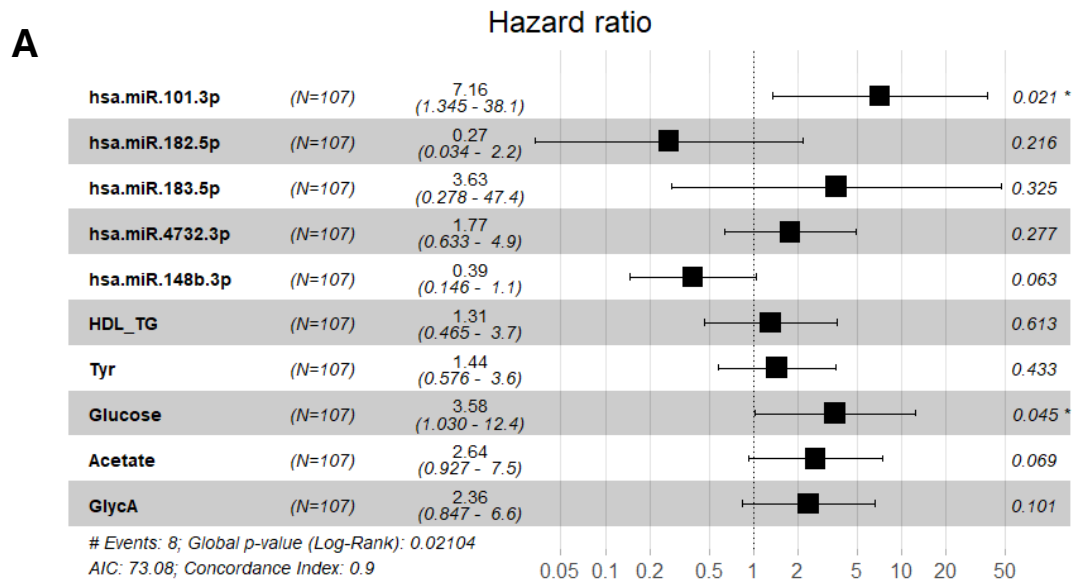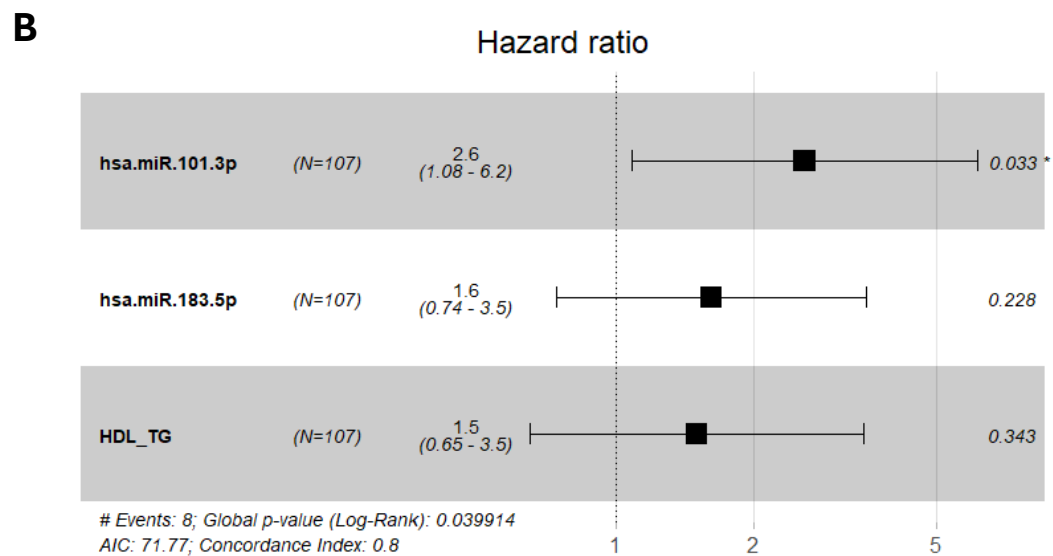

**SFig. 7.** Cox regression model performance on CRC cases only using A) 10 predictive biomarkers and B) 3 predictive biomarkers.

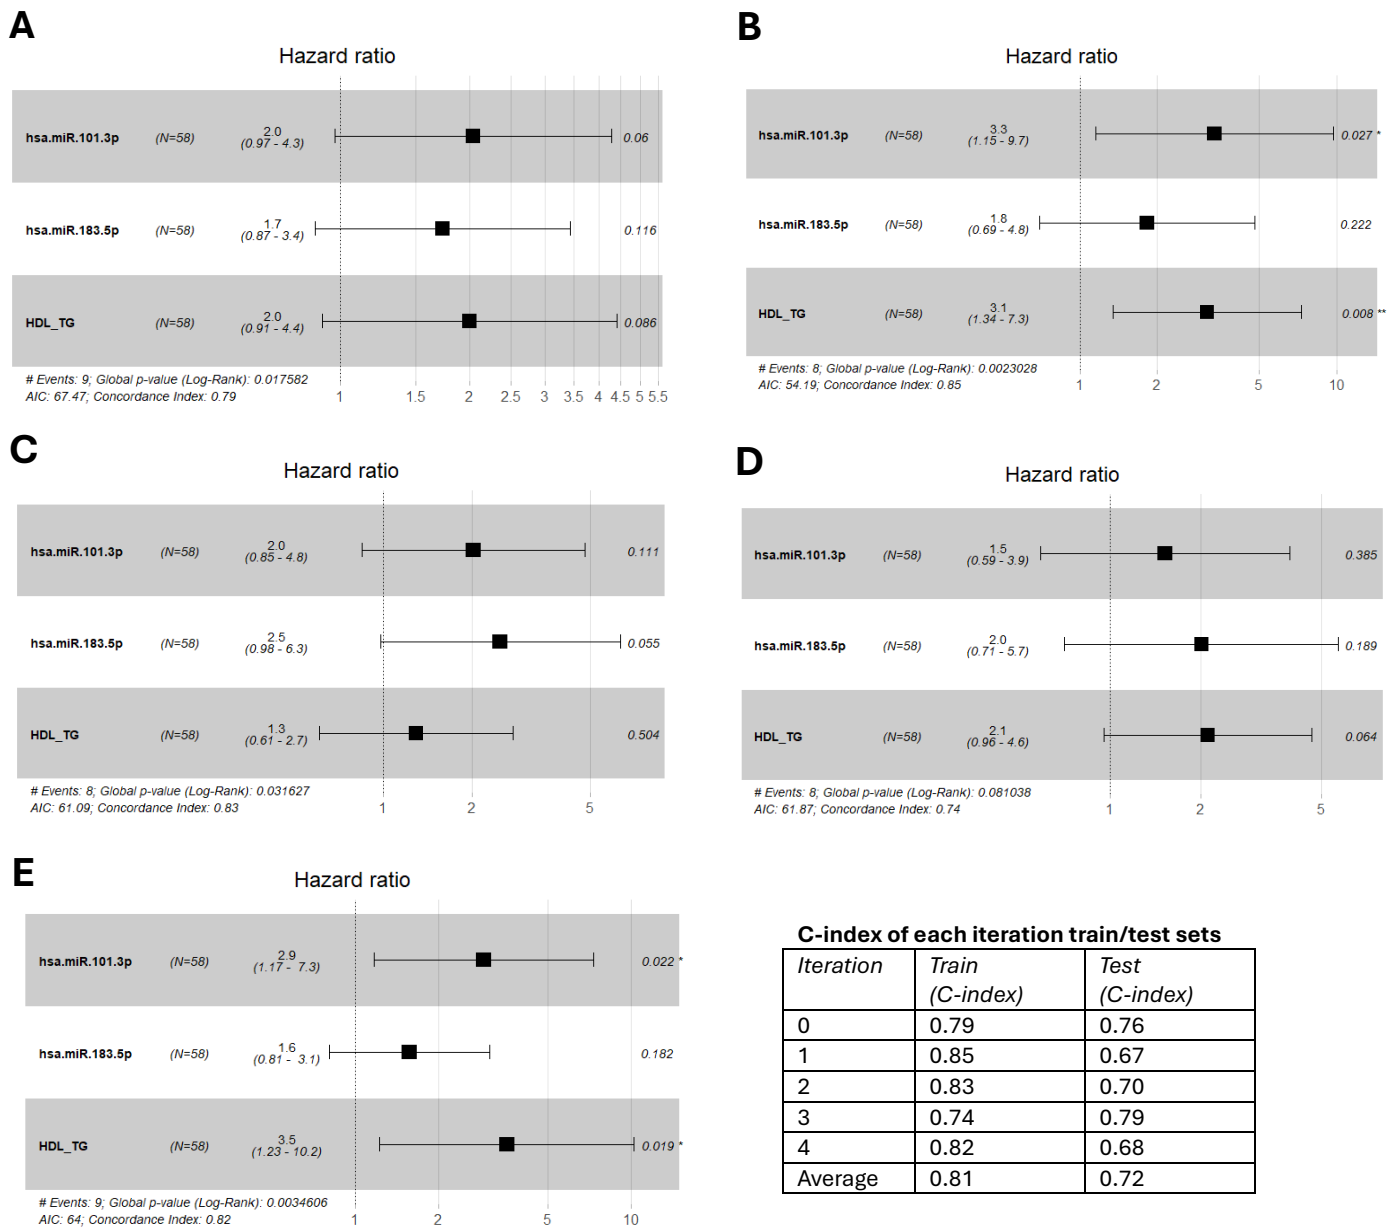

**SFig. 8.** Forest plots of Cox Proportional Hazards Model from 5 iterations and model's predictive accuracy of A) 0, B) 1st, C) 2nd, D) 3rd, and E) 4th iteration presenting the model (trained with corresponding train data) coefficients, CIs, C-index, and significance. The table presents each iteration's predictive accuracy (C-index) on corresponding test datasets.
